# Supplementary material for: Study to Improve Cardiovascular Outcomes in high-risk older patieNts (ICON1) with acute coronary syndrome: study design and protocol of a prospective observational study
Source: PubMed Central journal article supplement — BMJ Open. 2016 Aug 23;6(8):e012091. doi: 10.1136/bmjopen-2016-012091 (PMC5013351; doi:10.1136/bmjopen-2016-012091), 2016-08-23
Supplement: bmjopen-2016-012091supp_appendices.pdf [file bmjopen-2016-012091supp_appendices.pdf]

## Appendices

### Appendix 1: Fried Frailty Index derived from Cardiovascular Health Study

| Criterion                        | Frailty Status                                                                                                                                                                                                                                                                                                                                                                                                                                                                   |
|----------------------------------|----------------------------------------------------------------------------------------------------------------------------------------------------------------------------------------------------------------------------------------------------------------------------------------------------------------------------------------------------------------------------------------------------------------------------------------------------------------------------------|
| <b>Shrinking</b>                 | <b>Frailty cut point:</b><br><b>Baseline:</b> Self reported unintentional weight loss $\geq 10$ lb in previous year<br><b>Follow-up:</b> Unintentional weight loss $\geq 5\%$ of previous year's body weight<br><u>OR</u><br>BMI $< 18.5$ kg/m <sup>2</sup>                                                                                                                                                                                                                      |
| <b>Physical endurance/energy</b> | <i>Geriatric Depression Scale:</i><br>1. Do you feel full of energy?<br>2. During the last 4 weeks how often you rested in bed during day?<br><br>Response options: Every day, every week, once, not at all.<br><br><b>Frailty cut point:</b><br>No to 1 and every day or every week to 2.                                                                                                                                                                                       |
| <b>Low physical activity</b>     | <i>Frequency of mildly energetic, moderately energetic and very energetic physical activity.</i><br><br>Response options: $\geq 3$ times per week, 1-2 times per week, 1-3 times per month, hardly ever/never<br><br><b>Frailty cut point:</b><br>Hardly ever/never for very energetic physical activity AND for moderately energetic physical activity.                                                                                                                         |
| <b>Weakness</b>                  | Hand grip strength in Kg: GRIP-D hand held dynamometer, dominant hand, average of 3 measures.<br><br><b>Frailty cut point:</b><br><b>Grip strength:</b> lowest 20% (by gender, body mass index)<br><i>Men</i><br>BMI $\leq 24$ $\leq 29$<br>BMI 24.1–26 $\leq 30$<br>BMI 26.1–28 $\leq 30$<br>BMI $> 28$ $\leq 32$<br><i>Women</i><br>BMI $\leq 23$ $\leq 17$<br>BMI 23.1–26 $\leq 17.3$<br>BMI 26.1–29 $\leq 18$<br>BMI $> 29$ $\leq 21$                                        |
| <b>Slow walking speed</b>        | Walking time in seconds (usual pace) over 15 feet<br><br><b>Frailty cut point:</b><br>Slowest 20%, stratified by gender and median standing height.<br><i>Men</i><br>Height $\leq 173$ cm $\geq 7$ seconds<br>Height $> 173$ cm $\geq 6$ seconds<br><i>Women</i><br>Height $\leq 159$ cm $\geq 7$ seconds<br>Height $> 159$ cm $\geq 6$ seconds<br><br><u>OR</u><br>Time to complete "timed up and go test" (TUG)<br><br><b>Frailty cut point:</b><br>TUG time $\geq 19$ seconds |

**Frail:**  $\geq 3$  criteria present; **Intermediate or Pre-Frail:** 1 or 2 criteria present; **Robust :** 0 criteria present

Adapted from Fried et al, Cardiovascular Health Study Collaborative Research G. Frailty in older adults: Evidence for a phenotype. *The Journals of Gerontology. Series A, Biological sciences and medical sciences.* 2001;56:M146-156.

## Appendix 2: Rockwood Frailty Index derived from Canadian Study of Health and Aging

|   |                                                                                                                                                    |
|---|----------------------------------------------------------------------------------------------------------------------------------------------------|
| 1 | Very fit – robust, active, energetic, well motivated and fit; these people commonly exercise regularly and are in the most fit group for their age |
| 2 | Well – without active disease, but less fit than people in category 1.                                                                             |
| 3 | Well, with treated co-morbid disease – disease symptoms are well controlled compared with those in category 4                                      |
| 4 | Apparently vulnerable – although not frankly dependent, these people commonly complain of being “slowed up” or have disease symptoms.              |
| 5 | Mildly frail – with limited dependence on others for instrumental activities of daily living                                                       |
| 6 | Moderately frail – help is needed with both instrumental and non-instrumental activities of daily living                                           |
| 7 | Severely frail – completely dependent on others for the activities of daily living, or terminally ill.                                             |

*Adapted from Rockwood et al, A global clinical measure of fitness and frailty in elderly people. Canadian Medical Association Journal 2005;173:489-495*

### Appendix 3: Definitions of outcome measures

| Outcome                         | Definition                                                                                                                                                                                                                                                                                                                                                                                                                                        |
|---------------------------------|---------------------------------------------------------------------------------------------------------------------------------------------------------------------------------------------------------------------------------------------------------------------------------------------------------------------------------------------------------------------------------------------------------------------------------------------------|
| Death                           | Death from any cause<br>Classified as cardiovascular or non-cardiovascular                                                                                                                                                                                                                                                                                                                                                                        |
| Myocardial Infarction*          | Defined as below                                                                                                                                                                                                                                                                                                                                                                                                                                  |
| Type 1                          | Spontaneous myocardial infarction related to ischaemia due to a primary coronary event such as plaque erosion and/or rupture, fissuring, or dissection                                                                                                                                                                                                                                                                                            |
| Type 2                          | Myocardial infarction secondary to ischaemia due to either increased oxygen demand or decreased supply, e.g. coronary artery spasm, coronary embolism, anaemia, arrhythmias, hypertension, or hypotension                                                                                                                                                                                                                                         |
| Type 3                          | Sudden unexpected cardiac death, including cardiac arrest, often with symptoms suggestive of myocardial ischaemia, accompanied by presumably new ST elevation, or new LBBB, or evidence of fresh thrombus in a coronary artery by angiography and/or at autopsy, but death occurring before blood samples could be obtained, or at a time before the appearance of cardiac biomarkers in the blood                                                |
| Type 4a                         | Myocardial infarction associated with PCI                                                                                                                                                                                                                                                                                                                                                                                                         |
| Type 4b                         | Myocardial infarction associated with stent thrombosis as documented by angiography or at autopsy                                                                                                                                                                                                                                                                                                                                                 |
| Type 5                          | Myocardial infarction associated with CABG                                                                                                                                                                                                                                                                                                                                                                                                        |
| Revascularisation               | PCI to lesions not identified previously.<br>CABG for new symptoms or complications of PCI<br>Target lesion or target vessel revascularisation                                                                                                                                                                                                                                                                                                    |
| Target Lesion Revascularisation | Re-interventions inside the implanted stent or within 5 mm proximally or distally                                                                                                                                                                                                                                                                                                                                                                 |
| Target Vessel Revascularisation | Re-interventions in the same vessel by PCI or by CABG                                                                                                                                                                                                                                                                                                                                                                                             |
| Stroke                          | Stroke is defined as the presence of a new focal neurologic deficit thought to be vascular in origin, with signs or symptoms lasting more than 24 hours.<br>It is strongly recommended (but not required) that an imaging procedure such as CT scan or MRI be performed.<br>Stroke will be further classified as ischaemic, haemorrhagic or type uncertain.                                                                                       |
| Heart Failure                   | Heart failure will be defined as a hospital admission with any of the following symptoms and signs: worsening breathlessness, fatigue, fluid overload, pulmonary oedema, elevated venous pressure and elevated NT-prohormone Brain Natriuretic Peptide.<br>Confirmation of heart failure according to local expert judgement and evidence of impaired left ventricular function will be required for the event to be classified as heart failure. |
| Rehospitalisation               | Repeat hospitalisation for any reason during follow up period                                                                                                                                                                                                                                                                                                                                                                                     |
| Adverse Event                   | Any untoward medical occurrence                                                                                                                                                                                                                                                                                                                                                                                                                   |
| Serious Adverse Event           | Any untoward medical occurrence that: Results in death and is life-threatening. The term "life-threatening" in the definition of "serious adverse event" refers to an event that 1. Requires hospitalisation or prolongation of existing inpatient's hospitalisation; 2. Results in persistent or significant disability or incapacity.                                                                                                           |

*PCI-Percutaneous Coronary Intervention, CABG-Coronary Artery Bypass Graft, CT-Computerised Tomography, MRI-Magnetic Resonance Imaging*

*\* Adapted from Thygesan et al, Universal definition of myocardial infarction, European Heart Journal (2007) 28, 2525–2538*

## Appendix 4: Bleeding Academic Research Consortium (BARC) definition for bleeding

|         |                                                                                                                                                                                                                                                                                                                                                                                                                                                                         |
|---------|-------------------------------------------------------------------------------------------------------------------------------------------------------------------------------------------------------------------------------------------------------------------------------------------------------------------------------------------------------------------------------------------------------------------------------------------------------------------------|
| Type 0  | No bleeding                                                                                                                                                                                                                                                                                                                                                                                                                                                             |
| Type 1  | Bleeding that is not actionable and does not cause the patient to seek unscheduled performance of studies, hospitalization, or treatment by a healthcare professional. May include episodes leading to self-discontinuation of medical therapy by the patient without consulting a healthcare professional.                                                                                                                                                             |
| Type 2  | Any overt, actionable sign of haemorrhage (e.g. more bleeding than would be expected for a clinical circumstance, including bleeding found by imaging alone) that does not fit the criteria for Type 3, 4 or 5 but does meet at least one of the following criteria: (1) requiring non-surgical, medical intervention by a healthcare professional, (2) leading to hospitalization or increased level of care, or (3) prompting evaluation.                             |
| Type 3a | Overt bleeding plus haemoglobin drop of 3 to <5g/dl* (provided haemoglobin drop is due to bleed)<br>Any transfusion with overt bleeding                                                                                                                                                                                                                                                                                                                                 |
| Type 3b | Overt bleeding plus haemoglobin drop $\geq 5\text{g/dl}^*$ (provided haemoglobin drop is due to bleed)<br>Cardiac tamponade<br>Bleeding requiring surgical intervention for control (excluding dental/nasal/ skin/ haemorrhoid)<br>Bleeding requiring intravenous vasoactive agents                                                                                                                                                                                     |
| Type 3c | Intracranial haemorrhage (does not include micro-bleeds or haemorrhagic transformation, does include intraspinal)<br>Subcategories confirmed by autopsy or imaging or lumbar puncture<br>Intraocular bleed compromising vision                                                                                                                                                                                                                                          |
| Type 4: | CABG-related bleeding<br>Perioperative intracranial bleeding within 48 hours<br>Reoperation following closure of sternotomy for the purpose of controlling bleeding<br>Transfusion of $\geq 5$ units of whole blood or packed red blood cells within a 48-hour period†<br>Chest tube output $\geq 2$ litres within a 24-hour period<br>If a CABG-related bleed is not adjudicated as at least a Type 3 severity event, it will be classified as 'not a bleeding event'. |
| Type 5a | Probable fatal bleeding; no autopsy or imaging confirmation, but clinically suspicious                                                                                                                                                                                                                                                                                                                                                                                  |
| Type 5b | Definite fatal bleeding; overt bleeding or autopsy or imaging confirmation                                                                                                                                                                                                                                                                                                                                                                                              |

\*Corrected for transfusion (1 U packed red blood cells or 1 U whole blood 1 g/dL haemoglobin).

†Cell saver products are not counted.

Adapted from Mehran et al, Standardized bleeding definitions for cardiovascular clinical trials: A consensus report from the bleeding academic research consortium. *Circulation*. 2011;123:2736-2747
